# Supplementary material for: Household Transmission and Clinical Features of SARS-CoV-2 Infections by Age in 2 US Communities
Source: bioRxiv or medRxiv preprint supplement (doi:10.1101/2021.08.16.21262121), 2021-08-20
Supplement: Supplementary file [file media-1.pdf]

## Supplemental Materials

### Household Transmission and Clinical Features of SARS-CoV-2 Infections by Age in 2 US Communities

Huong Q. McLean, PhD, MPH,<sup>a</sup> Carlos G. Grijalva, MD, MPH,<sup>b</sup> Kayla E. Hanson, MPH,<sup>a</sup> Yuwei G. Zhu, MD, MS,<sup>b</sup> Jessica E. Deyoe, MPH,<sup>c</sup> Jennifer K. Meece, PhD,<sup>a</sup> Natasha B. Halasa, MD, MPH,<sup>b</sup> James D. Chappell, MD, PhD,<sup>b</sup> Alexandra Mellis, PhD,<sup>c</sup> Carrie Reed, DSc,<sup>c</sup> Edward A. Belongia, MD,<sup>a</sup> H. Keipp Talbot, MD, MPH,<sup>b</sup> Melissa A. Rolfes, PhD<sup>c</sup>

**Affiliations:** <sup>a</sup>Marshfield Clinic Research Institute, Marshfield, Wisconsin; <sup>b</sup>Vanderbilt University Medical Center, Nashville, Tennessee; and <sup>c</sup>Centers for Disease Control and Prevention, Atlanta, Georgia

**Supplemental Figure.** Reported symptoms, timing, and duration of specific symptoms by age group among persons with SARS-CoV-2 infection in a prospective study of SARS-CoV-2 household transmission — Tennessee and Wisconsin, April 2020–April 2021.

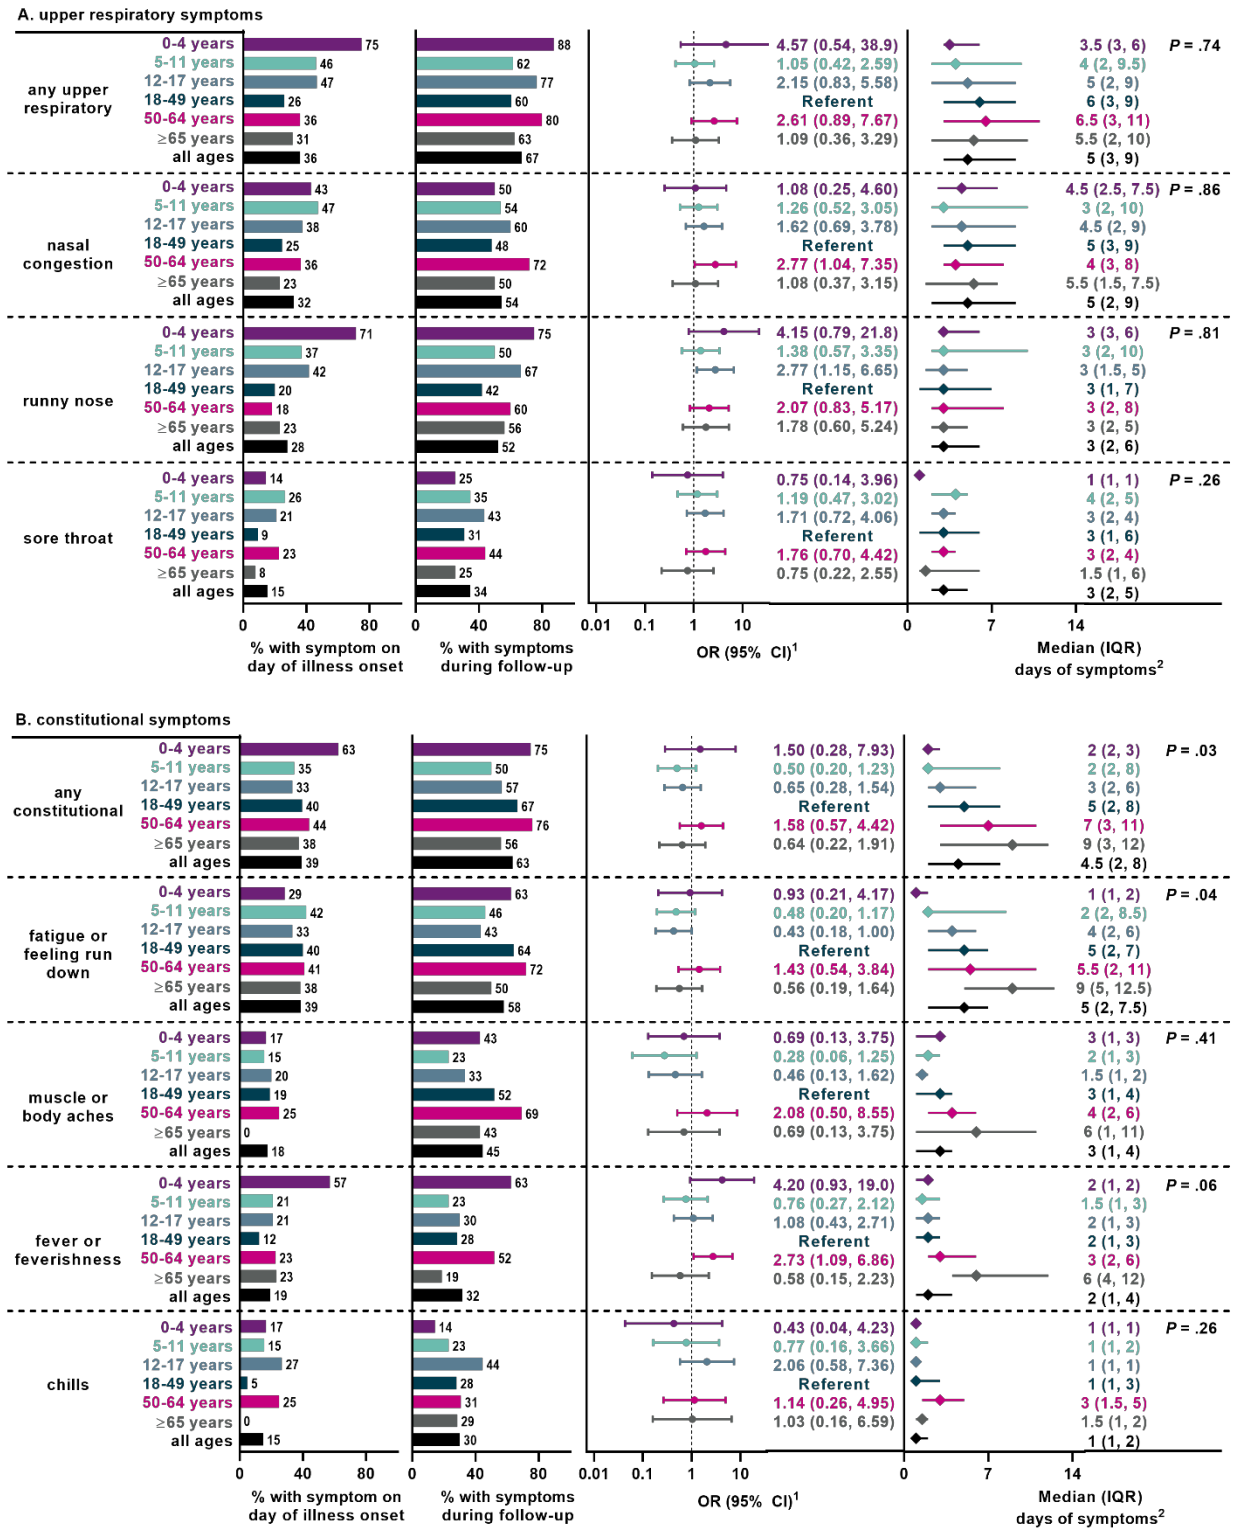

C. neurologic symptoms

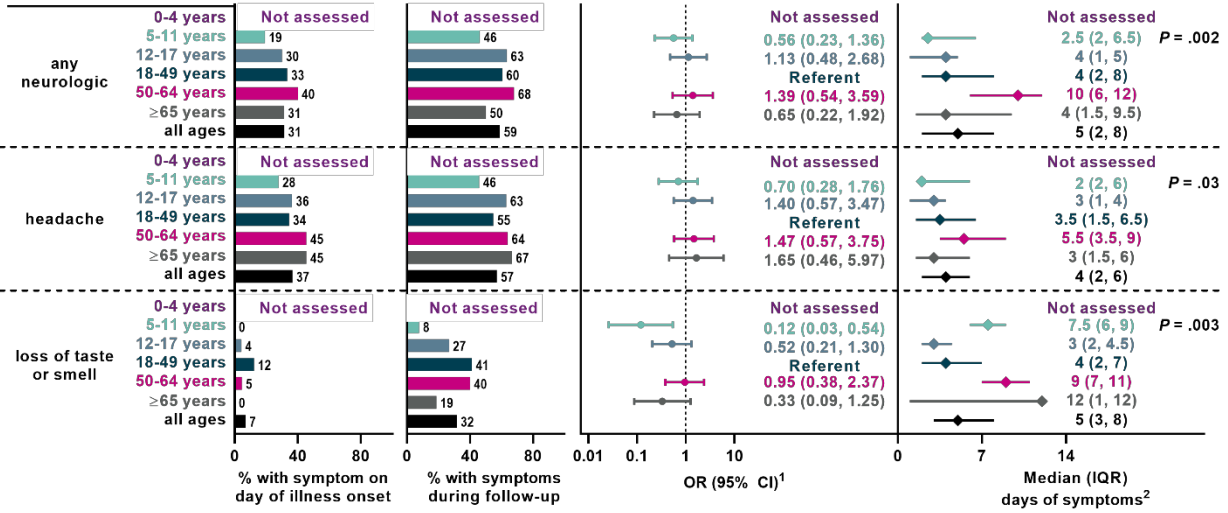

D. lower respiratory symptoms

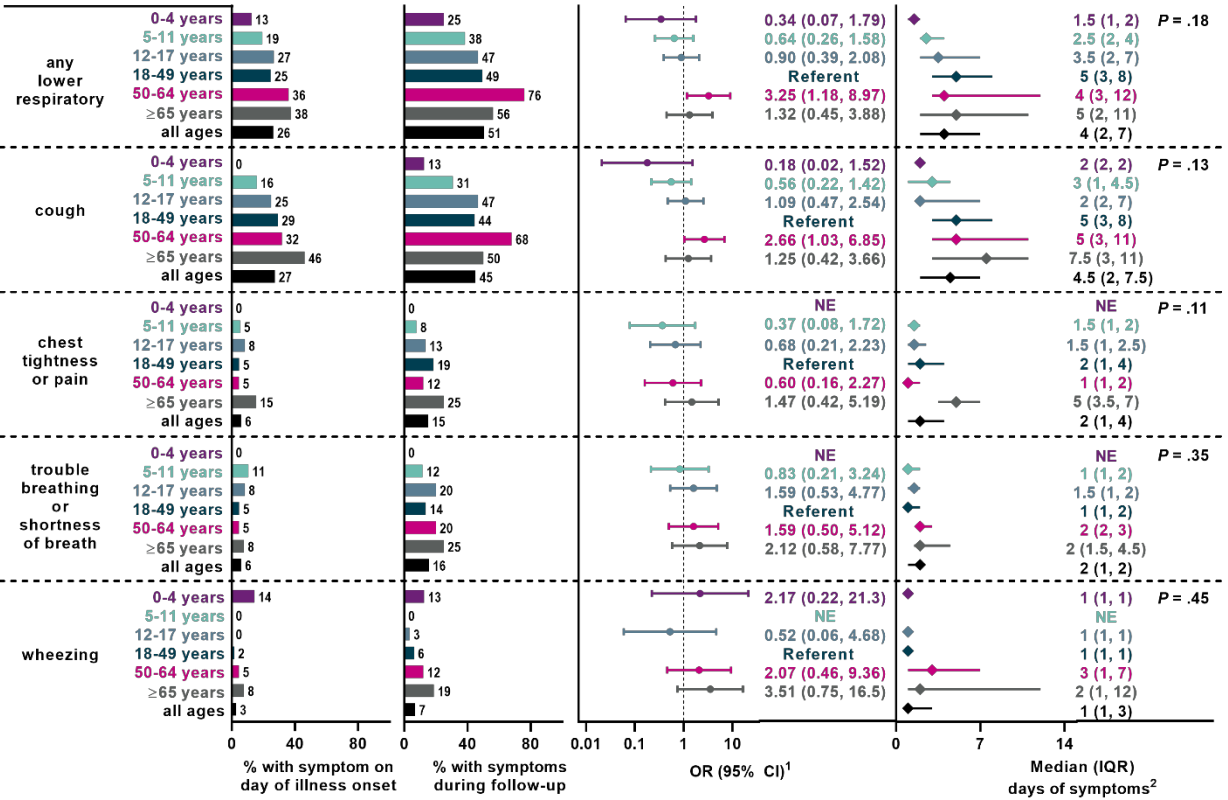

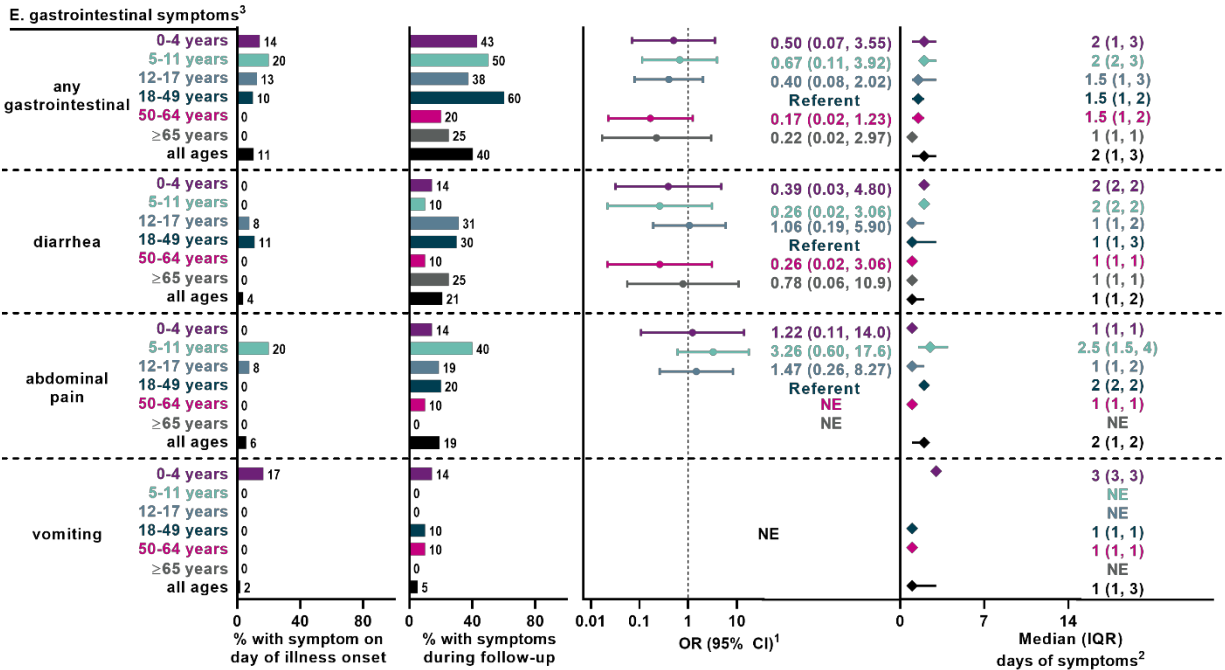

Abbreviation: OR, odds ratio; CI, confidence interval; IQR, interquartile range; NE, not estimated  
*P* value from Kruskal-Wallis Test comparing median days with symptoms across age groups.

<sup>1</sup>Measure of association between age group and odds of symptom reported during follow-up

<sup>2</sup>Among contacts who reported the specific symptoms

<sup>3</sup>Gastrointestinal symptoms were assessed only for Wisconsin participants
